# Supplementary material
Source: HighWire-hosted journal article supplement (https://svn.bmj.com/content/8/2/111)
Supplement: inline-supplementary-material-2 [file inline-supplementary-material-2.pdf]

## Supplement Data

Figure S1 Flowchart of patient selection

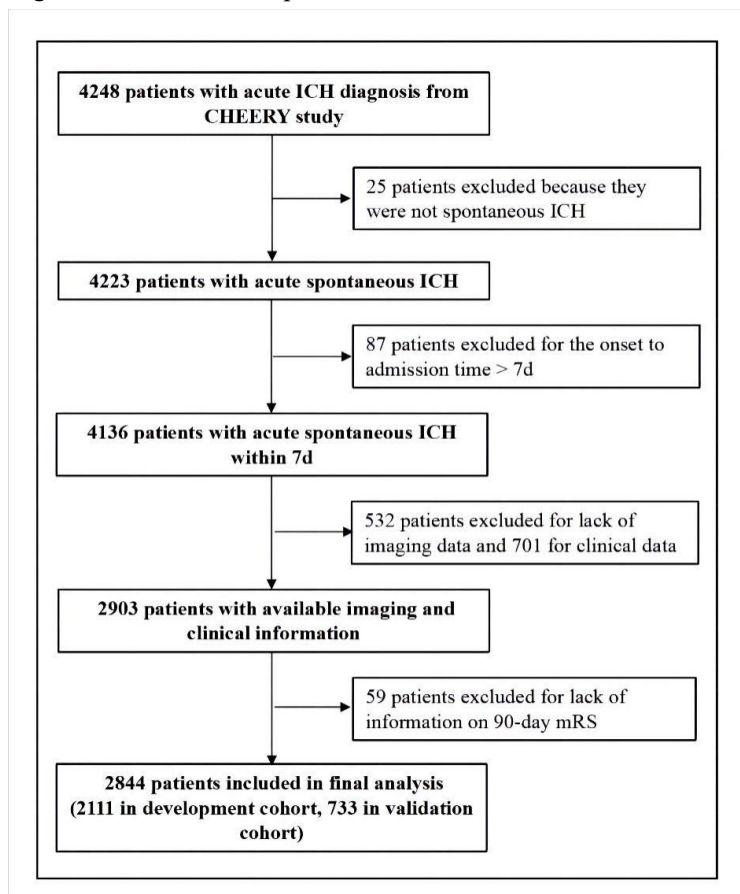

Table S1 Baseline Characteristics of Included and Excluded Patients

| Characteristics                    | Included (N=2844) | Excluded (N=1404) | P Value | Excluded (N=1102)# | P Value |
|------------------------------------|-------------------|-------------------|---------|--------------------|---------|
| <b>Demographic characteristics</b> |                   |                   |         |                    |         |
| Age, years                         | 62(53-70)         | 61(52-70)         | 0.536   | 61(52-70)          | 0.316   |
| Male                               | 1920(67.5)        | 935/1404(66.6)    | 0.550   | 729/1102(66.2)     | 0.415   |
| <b>Medical history</b>             |                   |                   |         |                    |         |
| Ischemic stroke                    | 288(10.1)         | 119/1371(8.7)     | 0.136   | 82/1070(7.7)       | 0.019   |
| Ischemic heart disease             | 99(3.5)           | 59/1371(4.3)      | 0.188   | 41/1070(3.8)       | 0.598   |
| Hypertension                       | 1838(64.6)        | 852/1370(62.2)    | 0.123   | 667/1070(62.3)     | 0.183   |
| Hyperlipidemia                     | 69(2.4)           | 47/1370(3.4)      | 0.062   | 40/1070(3.7)       | 0.026   |
| Diabetes                           | 261(9.2)          | 120/1370(8.8)     | 0.658   | 90/1070(8.4)       | 0.455   |
| <b>Admission characteristics</b>   |                   |                   |         |                    |         |
| Pre-stroke mRS                     | 0(0-0)            | 0(0-0)            | 0.075   | 0(0-0)             | 0.005   |
| SBP, mm Hg                         | 167(150-187)      | 160(140-182)      | <0.001  | 160(140-180)       | <0.001  |
| Baseline NIHSS                     | 8(4-15)           | 10(3-18)          | <0.001  | 9(3-16)            | 0.329   |
| Deep location                      | 2336(82.1)        | 996/1209(82.4)    | 0.852   | 785/965(81.3)      | 0.581   |
| Hematoma volume, mL                | 12.0(5.0-26.0)    | 14.1(5.9-28.0)    | 0.011   | 14.3(5.9-28.0)     | 0.011   |
| IVH                                | 321(11.3)         | 446/1404(31.8)    | <0.001  | 144/1102(13.1)     | 0.120   |
| <b>Admission laboratory values</b> |                   |                   |         |                    |         |
| WBC, $\times 10^9/L$               | 8.4(6.4-10.9)     | 9.0(6.7-11.7)     | <0.001  | 8.4(6.4-11.4)      | 0.209   |
| Hb, g/L                            | 136(124-147)      | 133(121-146)      | 0.001   | 134(121-146)       | 0.006   |
| PLT, $\times 10^9/L$               | 195(155-238)      | 191(150-238)      | 0.158   | 188(147-234)       | 0.060   |
| ANC, $\times 10^9/L$               | 6.3(4.5-9.1)      | 7.1(4.9-10.2)     | <0.001  | 6.7(4.5-9.9)       | 0.039   |
| ALC, $\times 10^9/L$               | 1.2(0.8-1.6)      | 1.1(0.7-1.6)      | 0.012   | 1.1(0.8-1.6)       | 0.121   |
| ALT, U/L                           | 18(13-26)         | 18(13-28)         | 0.328   | 19(13-29)          | 0.054   |
| AST, U/L                           | 23(18-30)         | 22(17-29)         | 0.051   | 22(17-30)          | 0.055   |
| Cr, $\mu\text{mol/L}$              | 68(56-84)         | 69(57-84)         | 0.526   | 68(57-84)          | 0.495   |
| UA, $\mu\text{mol/L}$              | 308(243-383)      | 293(223-371)      | <0.001  | 293(223-372)       | <0.001  |
| FBG, mmol/L                        | 6.2(5.3-7.7)      | 6.3(5.4-7.8)      | 0.305   | 6.1(5.2-7.4)       | 0.016   |
| INR                                | 1.0(0.9-1.1)      | 1.0(1.0-1.1)      | <0.001  | 1.0(1.0-1.1)       | 0.013   |
| <b>Outcome</b>                     |                   |                   |         |                    |         |
| Death at 90 days                   | 469(16.5)         | 236/1226(19.2)    | 0.033   | 169/932(18.1)      | 0.246   |
| mRS at 90 days                     |                   |                   |         |                    |         |
| 0-2                                | 1405(49.4)        | 545/1226(44.5)    | 0.004   | 448/932(48.1)      | 0.480   |
| 3-6                                | 1439(50.6)        | 681/1226(55.5)    |         | 484/932(51.9)      |         |

# 302 patients were excluded for IVH with unavailable hematoma volume in excluded set.

mRS indicates the modified Rankin Scale; SBP, systolic blood pressure; NIHSS, the National Institutes of Health Stroke Scale; IVH, intraventricular hemorrhage; WBC, White blood cell count; Hb, Hemoglobin; PLT, Platelet; ANC, Absolute neutrophil count; ALC, Absolute lymphocyte count; ALT, Glutamic pyruvic transaminase; AST, Aspartate aminotransferase; Cr, Creatinine; UA, Uric Acid; FBG, Fasting blood-glucose; INR, International normalized ratio.

Table S2 Comparison of the screening characteristics and scores of ICH models

| ADVISING            |       | MICH           |       | ICHOP               |       | ICH Score      |       | ICH-GS                      |       | ICH-FOS                     |       |
|---------------------|-------|----------------|-------|---------------------|-------|----------------|-------|-----------------------------|-------|-----------------------------|-------|
| Characteristic      | Point | Characteristic | Point | Characteristic      | Point | Characteristic | Point | Characteristic              | Point | Characteristic              | Point |
| Age, years          | -     | -              | -     | Age, years          | -     | Age, years     | -     | Age, years                  | -     | Age, years                  | -     |
| <60                 | 0     |                |       | <80                 | 0     | <45            | 1     | ≤59                         | 0     |                             |       |
| ≥60                 | 1     |                |       | ≥80                 | 1     | 45–64          | 2     | 60–69                       | 1     |                             |       |
|                     |       |                |       |                     |       | ≥65            | 3     | 70–79                       | 2     |                             |       |
|                     |       |                |       |                     |       |                |       | ≥80                         | 4     |                             |       |
| NIHSS score         | -     |                |       | NIHSS score         | -     |                |       |                             |       | NIHSS score                 | -     |
| 0–5                 | 0     |                |       | 0                   | 0     |                |       |                             |       | 0–5                         | 0     |
| 6–15                | 2     |                |       | 1–4                 | 1     |                |       |                             |       | 6–10                        | 2     |
| 16–40               | 3     |                |       | 5–15                | 2     |                |       |                             |       | 11–15                       | 3     |
|                     |       |                |       | 16–20               | 3     |                |       |                             |       | 16–20                       | 4     |
|                     |       |                |       | 21–42               | 4     |                |       |                             |       | ≥21                         | 5     |
| -                   |       | GCS score      |       | GCS score           |       | GCS score      |       | GCS score                   |       | GCS score                   |       |
|                     |       | 15–13          | 0     | 13–15               | 0     | 13–15          | 0     | 13–15                       | 1     | 15–13                       | 0     |
|                     |       | 12–5           | 1     | 9–12                | 1     | 5–12           | 1     | 9–12                        | 2     | 9–12                        | 1     |
|                     |       | 4–3            | 2     | 3–8                 | 2     | 3–4            | 2     | 3–8                         | 3     | 3–8                         | 2     |
| Deep location       | -     | -              | -     | ICH location        | -     | ICH location   | -     | ICH location                | -     | ICH location                | -     |
| No                  | 0     |                |       | Supratentorial      | 0     | Supratentorial | 1     | Supratentorial              | 1     | Supratentorial              | 0     |
| Yes                 | 1     |                |       | Infratentorial      | 1     | Infratentorial | 2     | Infratentorial              | 2     | Infratentorial              | 1     |
| Hematoma volume, ml |       | ICH volume, mL |       | Hematoma volume, mL |       | ICH volume, mL |       | ICH volume, mL              |       | ICH volume, mL              |       |
| <30                 | 0     | ≤20            | 0     | 0                   | 0     | <30            | 0     | For supratentorial location |       | For supratentorial location |       |
| 30–60               | 1     | 21–50          | 1     | 1–30                | 1     | ≥30            | 1     | <40                         | 1     | <40                         | 0     |
| >60                 | 2     | ≥51            | 2     | >30                 | 2     |                |       | 40–70                       | 2     | 40–70                       | 2     |
|                     |       |                |       |                     |       |                |       | >70                         | 3     | >70                         | 2     |
|                     |       |                |       |                     |       |                |       | For infratentorial location |       | For infratentorial location |       |

|                                |      |                      |     |             |     |             |     |                           |                           |             |      |
|--------------------------------|------|----------------------|-----|-------------|-----|-------------|-----|---------------------------|---------------------------|-------------|------|
|                                |      |                      |     |             |     | <10         | 1   | <10                       | 0                         |             |      |
|                                |      |                      |     |             |     | 10–20       | 2   | 10–20                     | 2                         |             |      |
|                                |      |                      |     |             |     | >20         | 3   | >20                       | 2                         |             |      |
| -                              |      | IVH or hydrocephalus | -   |             | IVH |             |     | Extension into ventricles | Extension into ventricles |             |      |
|                                |      | No                   | 0   |             | No  | 0           | No  | 1                         | No                        | 0           |      |
|                                |      | Yes                  | 1   |             | Yes | 1           | Yes | 2                         | Yes                       | 1           |      |
| FBG, mmol/L                    | -    | -                    | -   | -           | -   | -           | -   | Admission glucose, mmol/L | -                         |             |      |
| <7.0                           | 0    |                      |     |             |     |             |     | ≤11.0                     | 0                         |             |      |
| ≥7.0                           | 1    |                      |     |             |     |             |     | ≥11.1                     | 1                         |             |      |
| AST, U/L                       | -    | -                    | -   | -           | -   | -           | -   | -                         | -                         |             |      |
| ≤40                            | 0    |                      |     |             |     |             |     |                           |                           |             |      |
| >40                            | 1    |                      |     |             |     |             |     |                           |                           |             |      |
| INR                            | -    | -                    | -   | -           | -   | -           | -   | -                         | -                         |             |      |
| <1.2                           | 0    |                      |     |             |     |             |     |                           |                           |             |      |
| ≥1.2                           | 1    |                      |     |             |     |             |     |                           |                           |             |      |
| NLR                            | -    | -                    | -   | -           | -   | -           | -   | -                         | -                         |             |      |
| ≤10                            | 0    |                      |     |             |     |             |     |                           |                           |             |      |
| >10                            | 1    |                      |     |             |     |             |     |                           |                           |             |      |
| GFR, mL/min/1.73m <sup>2</sup> | -    | -                    | -   | -           | -   | -           | -   | -                         | -                         |             |      |
| ≥90                            | 0    |                      |     |             |     |             |     |                           |                           |             |      |
| <90                            | 1    |                      |     |             |     |             |     |                           |                           |             |      |
| Total score                    | 0-12 | Total score          | 0-5 | Total score | 0-8 | Total score | 0-6 | Total score               | 0-13                      | Total score | 0-16 |

ICH indicates intracerebral hemorrhage; MICH, modified ICH; ICHOP, ICH outcomes project score; ICH-GS, ICH grading scale; ICH-FOS, ICH functional outcome score; NIHSS, the National Institutes of Health Stroke Scale; GCS, Glasgow Coma Scale; IVH, intraventricular hemorrhage; AST, aspartate aminotransferase; INR, international normalized ratio; NLR, neutrophil lymphocyte ratio; GFR, glomerular filtration rate; FBG, fasting blood-glucose.

Table S3 Comparison in predictive power of ADVISING score and other ICH scores in validation cohort

| ICH Scores | 90-day functional dependence AUC (95% CI) | Difference between ROCs (95% CI) | Z     | P      |
|------------|-------------------------------------------|----------------------------------|-------|--------|
| ADVISING   | 0.879(0.854-0.904)                        | -                                |       | -      |
| MICH       | 0.757(0.722-0.793)                        | 0.122(0.092-0.150)               | 8.103 | <0.001 |
| ICHOP      | 0.836(0.808-0.866)                        | 0.043(0.026-0.059)               | 5.015 | <0.001 |
| ICH Score  | 0.750(0.714-0.786)                        | 0.129(0.098-0.160)               | 8.110 | <0.001 |
| ICH-GS     | 0.759(0.724-0.794)                        | 0.120(0.089-0.151)               | 7.592 | <0.001 |
| ICH-FOS    | 0.845(0.816-0.873)                        | 0.034(0.017-0.051)               | 3.936 | <0.001 |

AUC (95% CI) indicates area under receiver operating characteristic curve (95% Confidence Interval); ICH, intracerebral hemorrhage; MICH, modified ICH; ICHOP, ICH outcomes project score; ICH-GS, ICH grading scale; ICH-FOS, ICH functional outcome score.

Table S4 Comparison in predictive power of ADVISING score and other ICH scores

|            |               | The ADVISING Score       |     |                          |     |       |        |        |       |        |        |
|------------|---------------|--------------------------|-----|--------------------------|-----|-------|--------|--------|-------|--------|--------|
|            |               | 90-day mRS (3-6) (N=391) |     | 90-day mRS (0-2) (N=315) |     |       |        |        |       |        |        |
| ICH scores | Frequency (%) | ≤50                      | >50 | ≤50                      | >50 | NRI   | Z test | P      | IDI   | Z test | P      |
| MICH       | ≤50           | 42                       | 88  | 199                      | 48  | 0.134 | 3.455  | <0.001 | 0.192 | 11.039 | <0.001 |
|            | >50           | 17                       | 244 | 33                       | 35  |       |        |        |       |        |        |
| ICHOP      | ≤50           | 53                       | 83  | 222                      | 50  | 0.070 | 2.030  | <0.001 | 0.099 | 9.189  | <0.001 |
|            | >50           | 6                        | 249 | 10                       | 33  |       |        |        |       |        |        |
| ICH Score  | ≤50           | 50                       | 100 | 212                      | 51  | 0.134 | 3.554  | <0.001 | 0.196 | 11.617 | <0.001 |
|            | >50           | 9                        | 232 | 20                       | 32  |       |        |        |       |        |        |
| ICH-GS     | ≤50           | 53                       | 125 | 215                      | 55  | 0.184 | 4.618  | <0.001 | 0.209 | 12.141 | <0.001 |
|            | >50           | 6                        | 207 | 17                       | 28  |       |        |        |       |        |        |
| ICH-FOS    | ≤50           | 45                       | 57  | 208                      | 34  | 0.078 | 2.415  | <0.001 | 0.084 | 7.636  | <0.001 |
|            | >50           | 14                       | 275 | 24                       | 49  |       |        |        |       |        |        |

mRS indicates the modified Rankin Scale; NRI, net reclassification index; IDI, integrated discrimination improvement; ICH, intracerebral hemorrhage; MICH, modified ICH; ICHOP, ICH outcomes project score; ICH-GS, ICH grading scale; ICH-FOS, ICH functional outcome score.
